# Supplementary material
Source: Springer Nature journal article supplement (https://www.springermedizin.de/resource/supplementary/12947_2012_430_MOESM4_ESM.pdf/9555720)

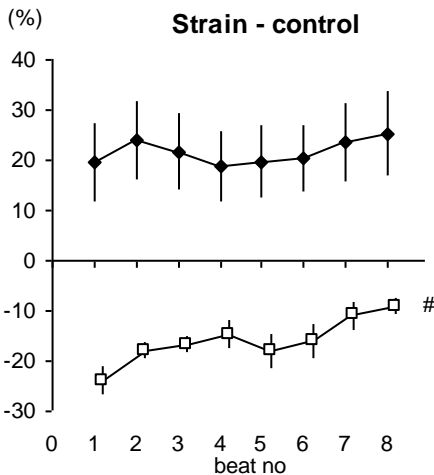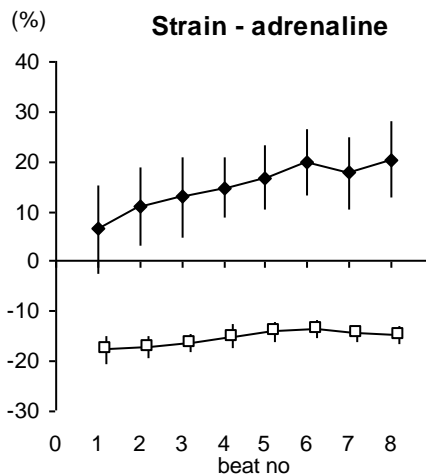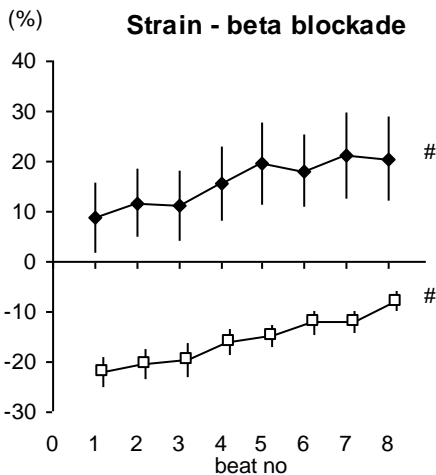

Supplement: MOESM4 [file 9555720]
